# Supplementary material for: Exploratory investigation of plasma metabolomics in human lung adenocarcinoma
Source: Royal Society of Chemistry journal article supplement (doi:10.1039/c3mb70138g), 2013-06-20
Supplement: c3mb70138g.pdf [file c3mb70138g.pdf]

|                    | $Q^2$                 |                       |        |
|--------------------|-----------------------|-----------------------|--------|
|                    | LC-MS (Positive mode) | LC-MS (Negative mode) | GC-MS  |
| Lung cancer status | 0.965                 | 0.963                 | 0.844  |
| Age (median)       | -0.889                | -0.657                | -0.7   |
| Gender             | -2.2                  | -1.9                  | -0.583 |
| Smoking habits     | -1.7                  | -1.8                  | -0.531 |
